# Supplementary material
Source: PubMed Central journal article supplement (PMC3432726)

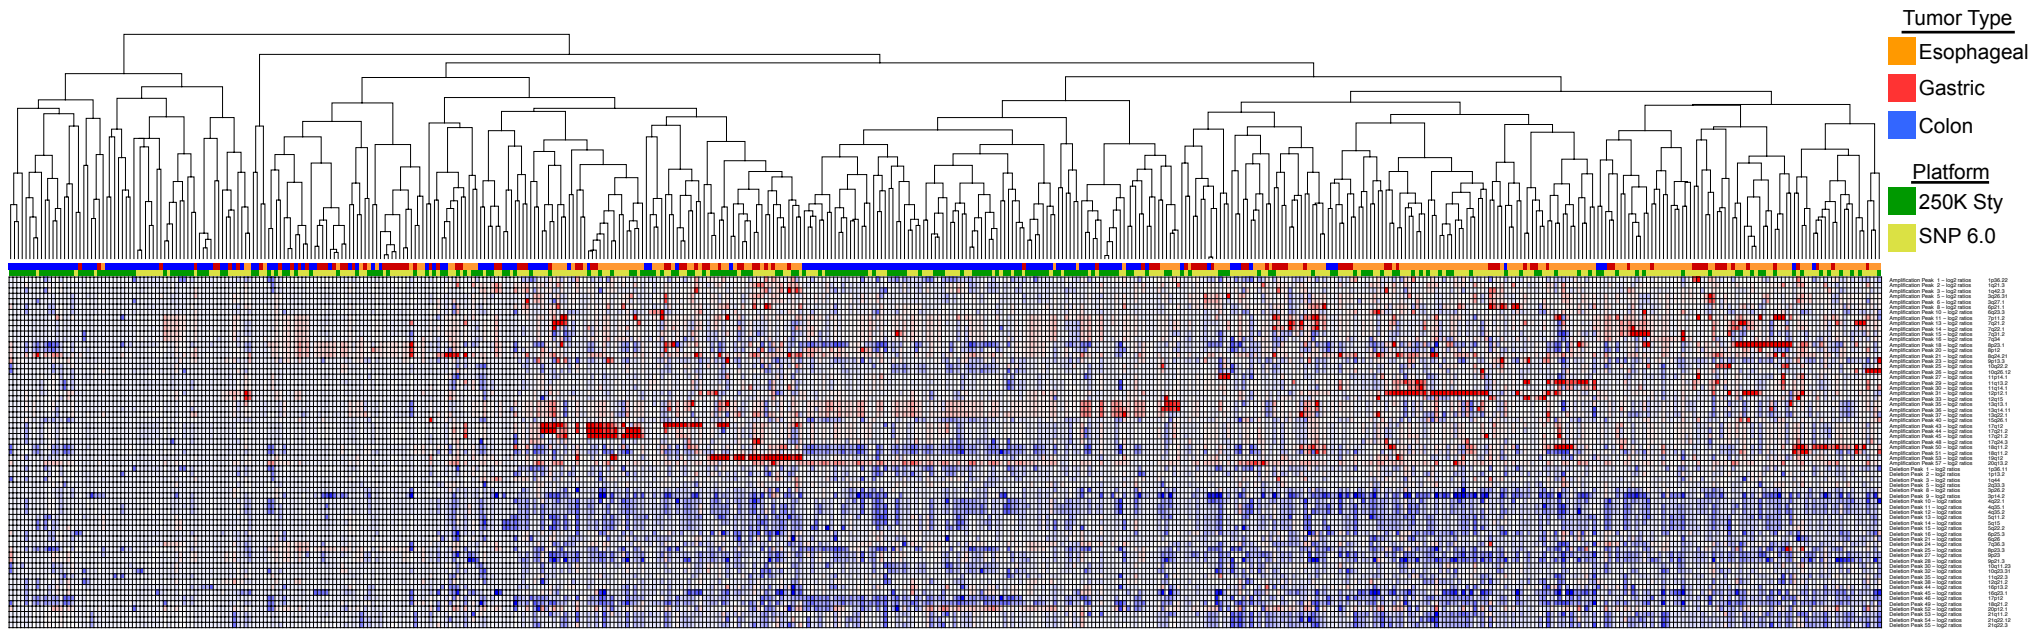

Supplement: NIHMS393772-supplement-6.pdf [file NIHMS393772-supplement-6.pdf]
